# Supplementary material for: Low-Cost and Environmental-Friendly Route for Synthesizing Nano-Rod Aluminosilicate MAZ Zeolite
Source: MDPI journal article supplement (doi:10.3390/molecules27227930), 2022-11-16
Supplement: s1 [file s1]

## Supporting Information

# Low-Cost and Environmental-Friendly Route for Synthesizing Nano-Rod Aluminosilicate MAZ Zeolite

Fen Zhang <sup>1</sup>, Wei Chen <sup>1</sup>, Lingling Wang <sup>1</sup>, Weiguo Song <sup>2</sup> and Yin Hu <sup>1,\*</sup>

<sup>1</sup> Institute of Applied Chemistry, Jiangxi Academy of Sciences, Nanchang 330096, China

<sup>2</sup> Institute of Chemistry, Chinese Academy of Sciences, Beijing 100190, China

\* Correspondence: huyin@jxas.ac.cn

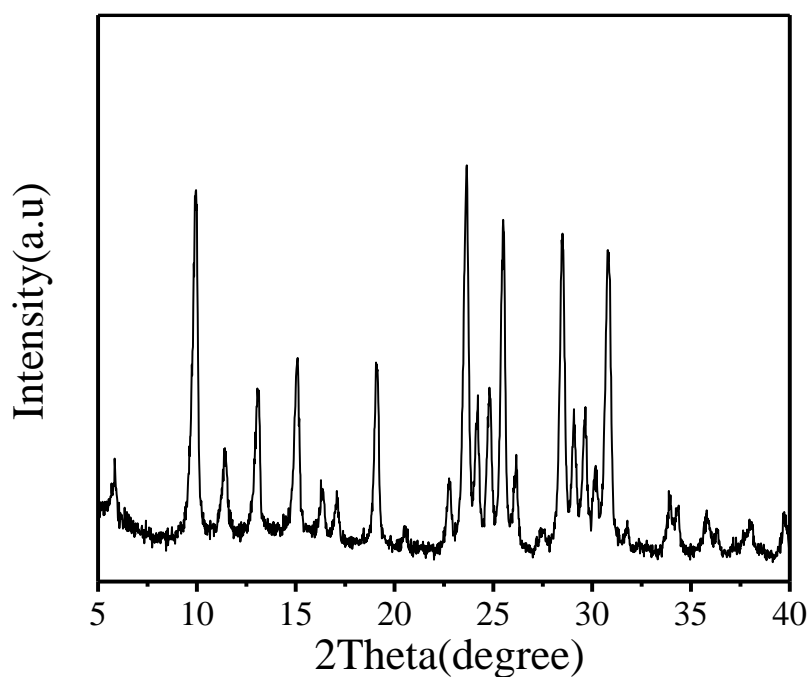

**Figure S1.** XRD pattern of the as-synthesized MAZ-C zeolite.

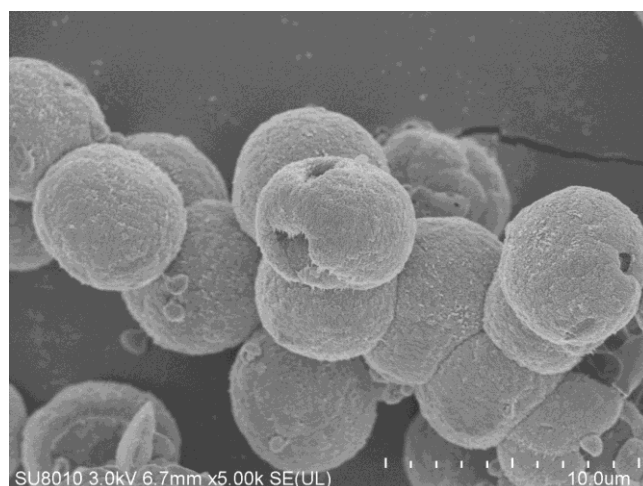

**Figure S2.** SEM image of the as-synthesized MAZ-C zeolite.
